# Supplementary material
Source: Royal Society of Chemistry journal article supplement (doi:10.1039/d6nr00623j)
Supplement: d6nr00623j1.pdf [file d6nr00623j1.pdf]

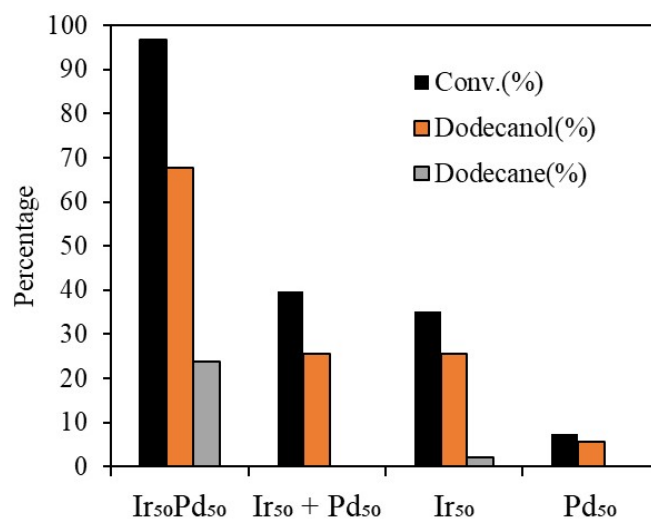

**Figure S1.** Comparison of hydrogenation reaction of dodecanoic acid over Ir<sub>50</sub>Pd<sub>50</sub>/Nb<sub>2</sub>O<sub>5</sub> (Ir = Pd = 0.15 mmol, total 0.30 mmol) vs physical mixture of Ir<sub>50</sub>/Nb<sub>2</sub>O<sub>5</sub> (Ir = 0.15 mmol) and Pd<sub>50</sub>/Nb<sub>2</sub>O<sub>5</sub> (Pd = 0.15 mmol). *Reaction conditions:* dodecanoic acid (0.1 g, ca. 0.5 mmol), catalyst (0.1 g), 1,4-dioxane (10 mL), H<sub>2</sub> (4.0 MPa), 150 °C, 900 rpm.

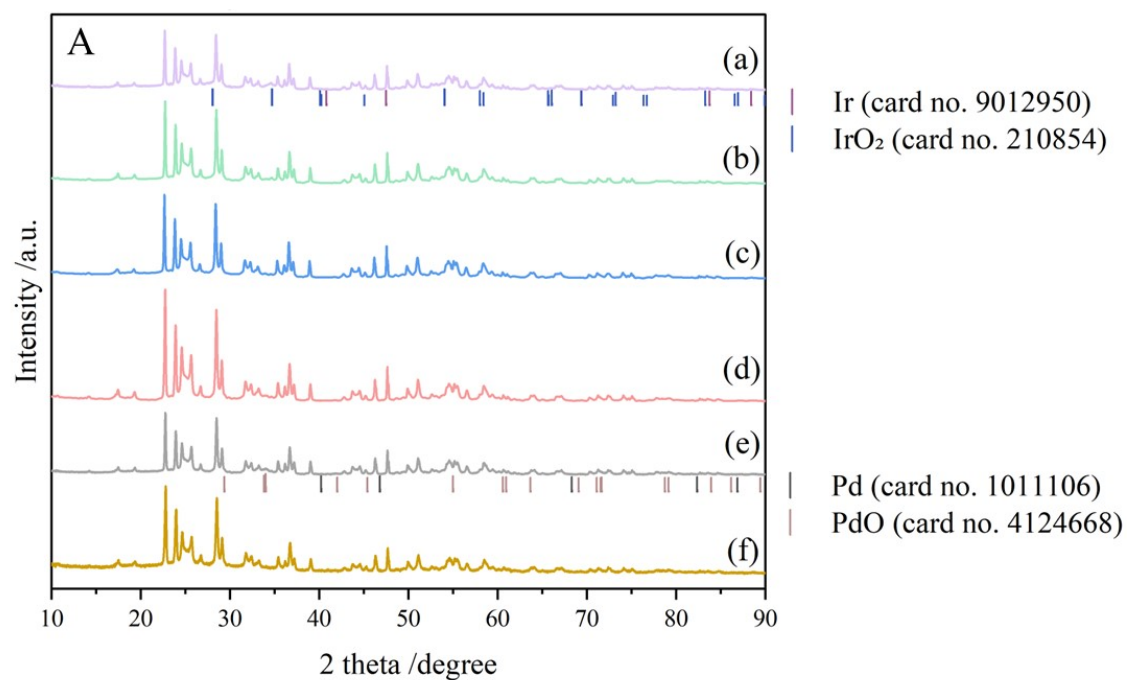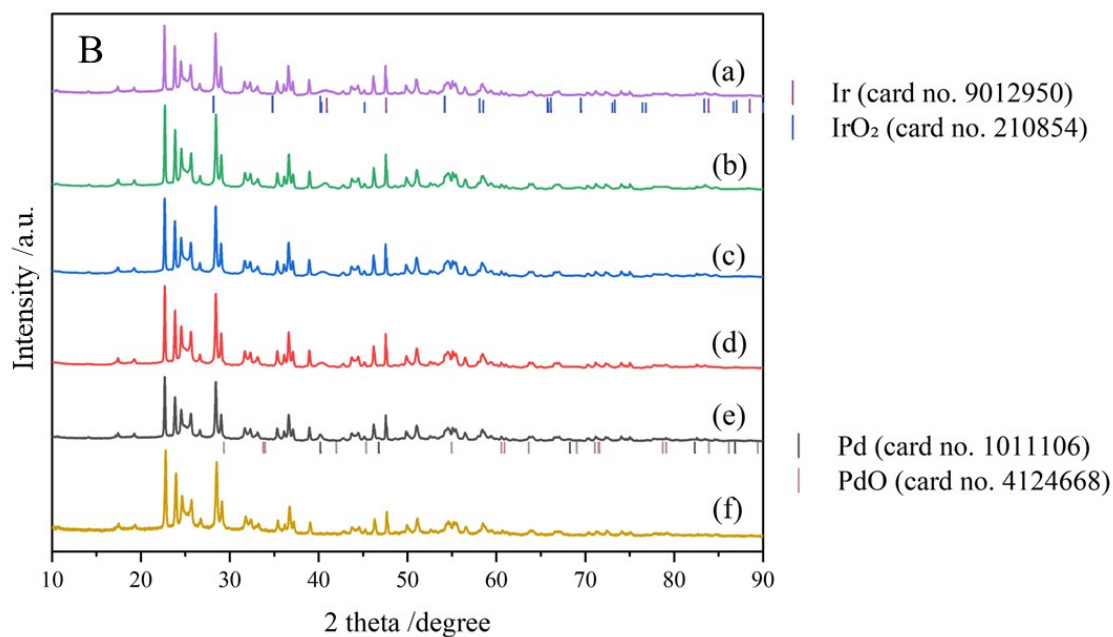

**Figure S2.** XRD patterns of (A) calcined and (B) reduced Ir<sub>x</sub>Pd<sub>y</sub>/Nb<sub>2</sub>O<sub>5</sub> at the full range of 2θ = 10–90 degrees: (a) Ir<sub>100</sub>/Nb<sub>2</sub>O<sub>5</sub>, (b) Ir<sub>75</sub>Pd<sub>25</sub>/Nb<sub>2</sub>O<sub>5</sub>, (c) Ir<sub>50</sub>Pd<sub>50</sub>/Nb<sub>2</sub>O<sub>5</sub>, (d) Ir<sub>25</sub>Pd<sub>75</sub>/Nb<sub>2</sub>O<sub>5</sub>, (e) Pd<sub>100</sub>/Nb<sub>2</sub>O<sub>5</sub>, and (f) Nb<sub>2</sub>O<sub>5</sub>.

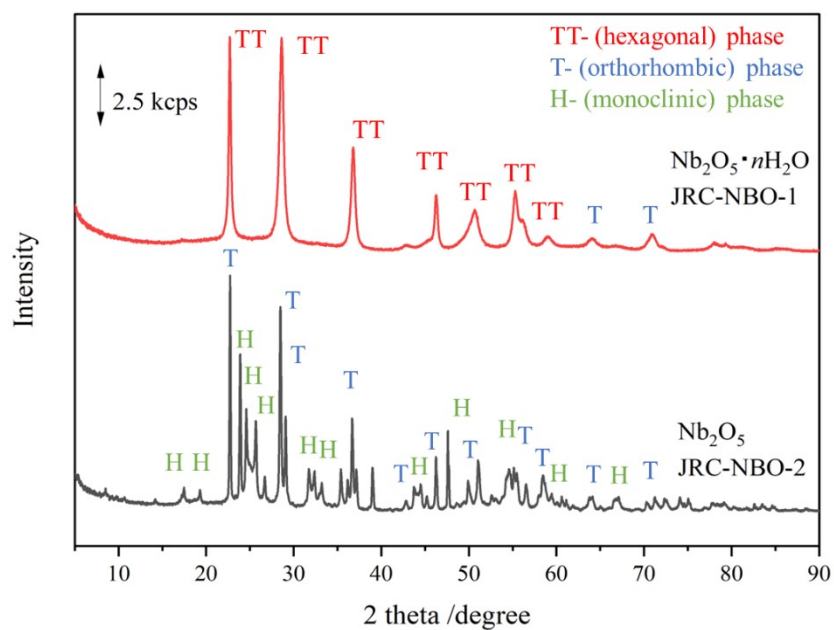

**Figure S3.** XRD patterns of Nb<sub>2</sub>O<sub>5</sub>·*n*H<sub>2</sub>O (JRC-NBO-1) and Nb<sub>2</sub>O<sub>5</sub> (JRC-NBO-2), which were calcined for 5 h at 500 °C and then reduced for 2 h at 500 °C.

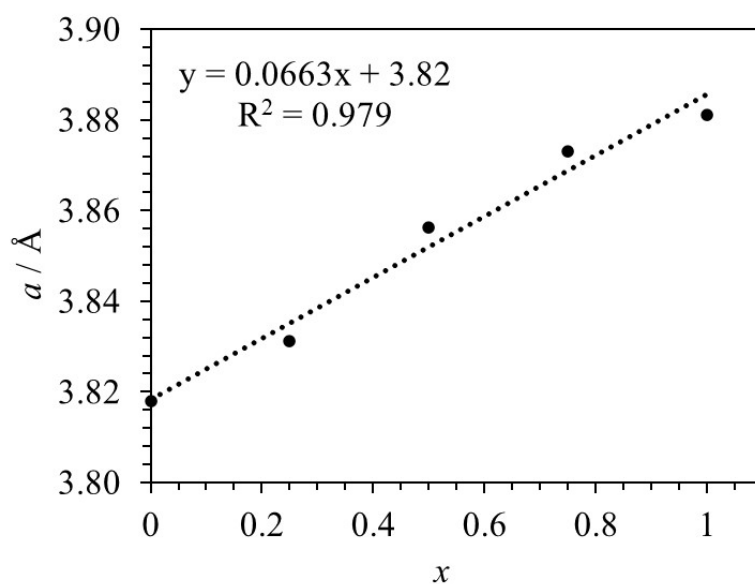

**Figure S4.** XRD peak shifts of Ir<sub>(1-x)</sub>Pd<sub>x</sub>/Nb<sub>2</sub>O<sub>5</sub> catalysts based on Ir (111) and Pd (111) planes: *a*; lattice parameter (Å), *x*; preparation ratio of Pd, and *R*; correlation coefficient.

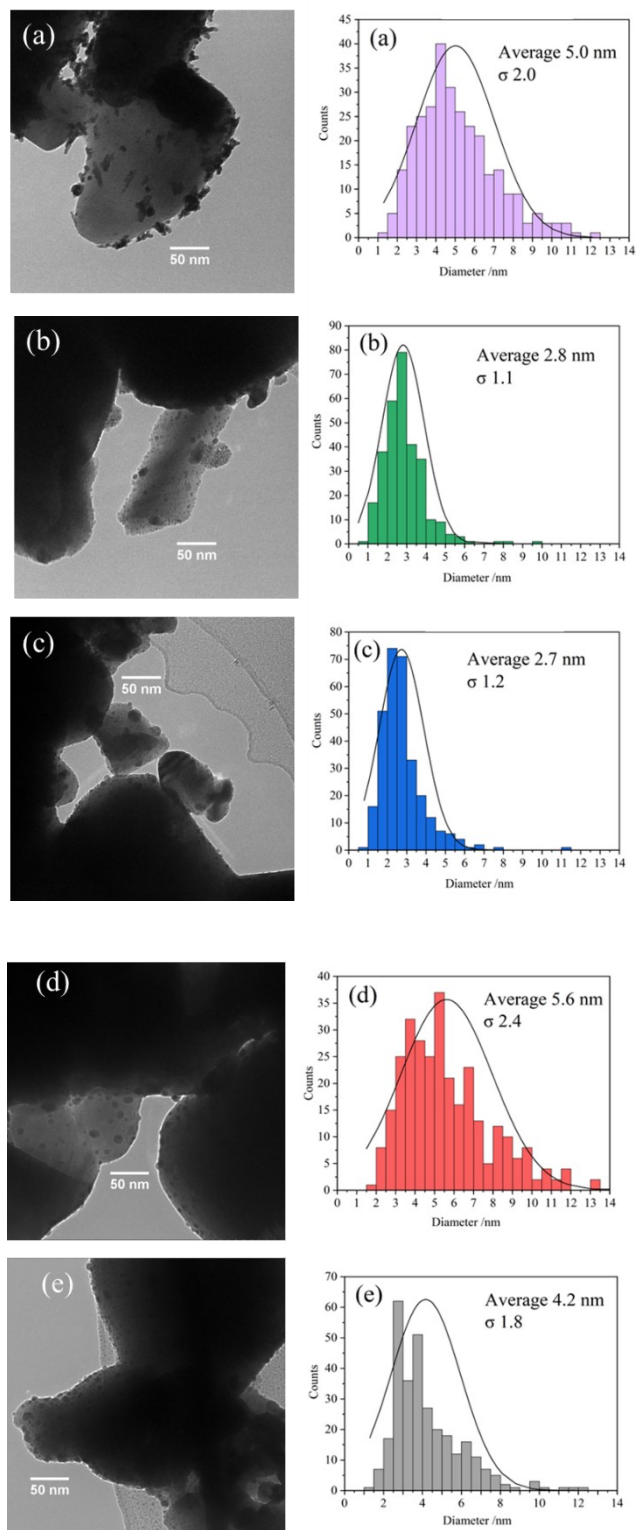

**Figure S5.** TEM images and histograms of the particle size distribution with 300 particles of  $\text{Ir}_x\text{Pd}_y$  nanoparticles on  $\text{Nb}_2\text{O}_5$  support: (a)  $\text{Ir}_{100}$ , (b)  $\text{Ir}_{75}\text{Pd}_{25}$ , (c)  $\text{Ir}_{50}\text{Pd}_{50}$ , (d)  $\text{Ir}_{25}\text{Pd}_{75}$ , and (e)  $\text{Pd}_{100}$ .

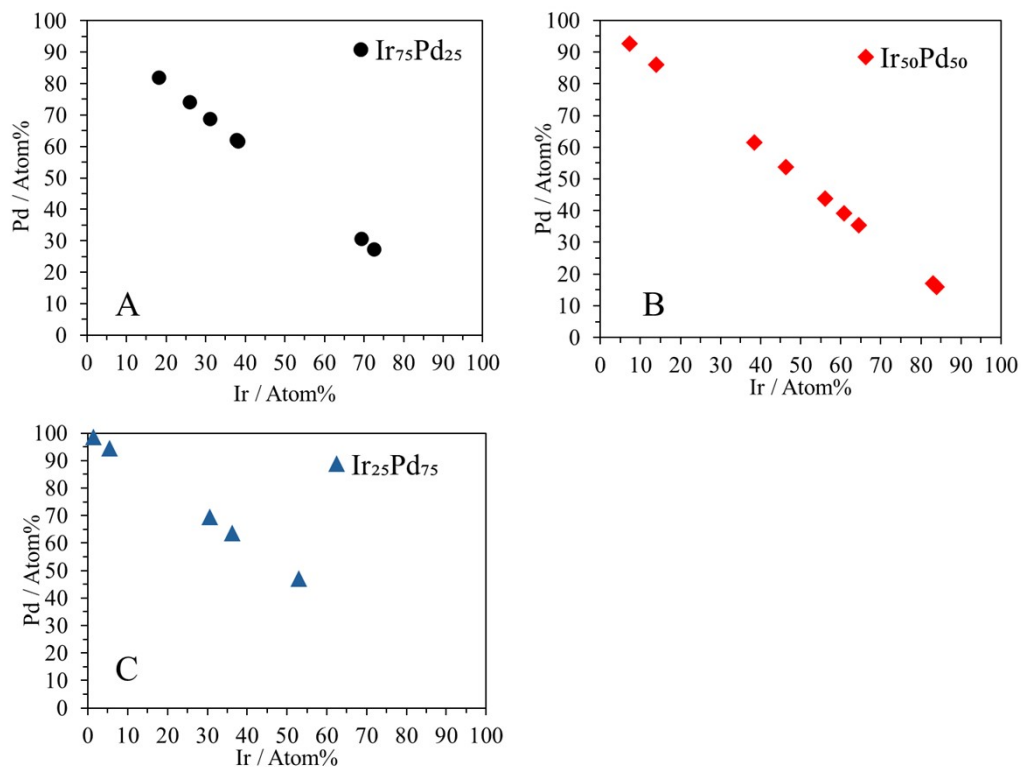

**Figure S6.** STEM-EDX spot-analysis results for several ratios of IrPd NPs loaded on Nb<sub>2</sub>O<sub>5</sub>: (A) Ir<sub>75</sub>Pd<sub>25</sub>, (B) Ir<sub>50</sub>Pd<sub>50</sub> and (C) Ir<sub>25</sub>Pd<sub>75</sub>.

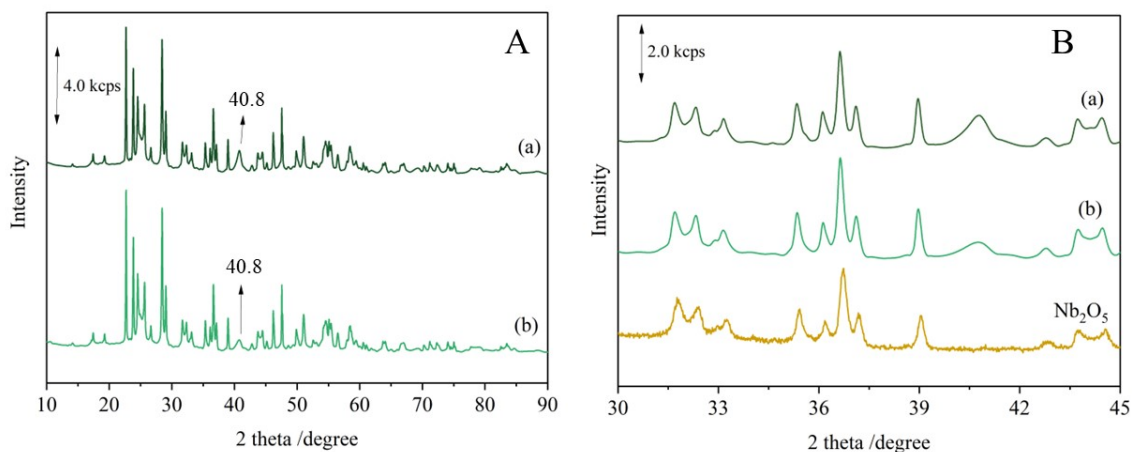

**Figure S7.** XRD patterns of (a) spent (after 3<sup>rd</sup> reuse test) and (b) fresh (as-prepared) Ir<sub>75</sub>Pd<sub>25</sub>/Nb<sub>2</sub>O<sub>5</sub> at the range of (A) 10–90 degrees, and (B) 30–45 degrees.

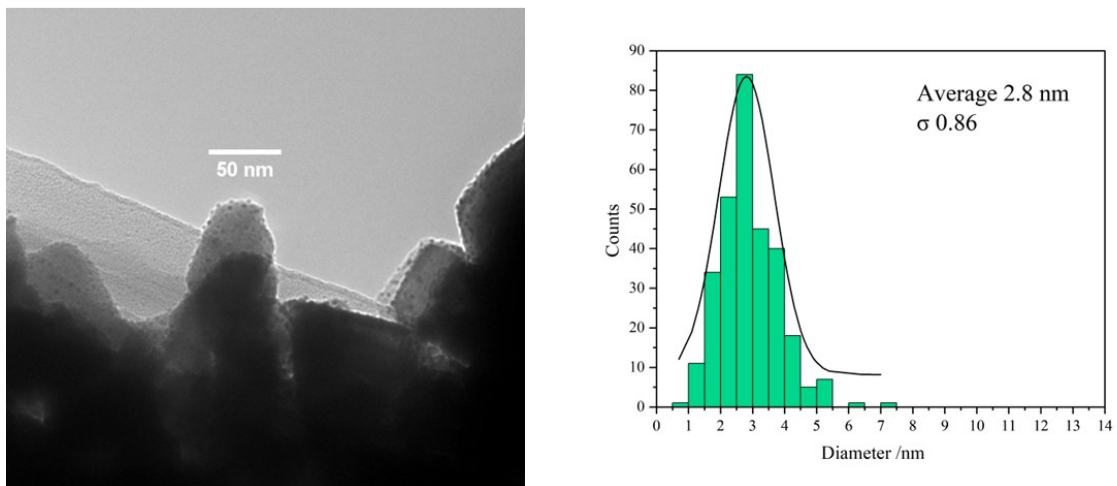

**Figure S8.** TEM image and histogram of the size distribution with 300 particles of Ir<sub>75</sub>Pd<sub>25</sub> nanoparticles on Nb<sub>2</sub>O<sub>5</sub> support after the 3<sup>rd</sup> reuse test.

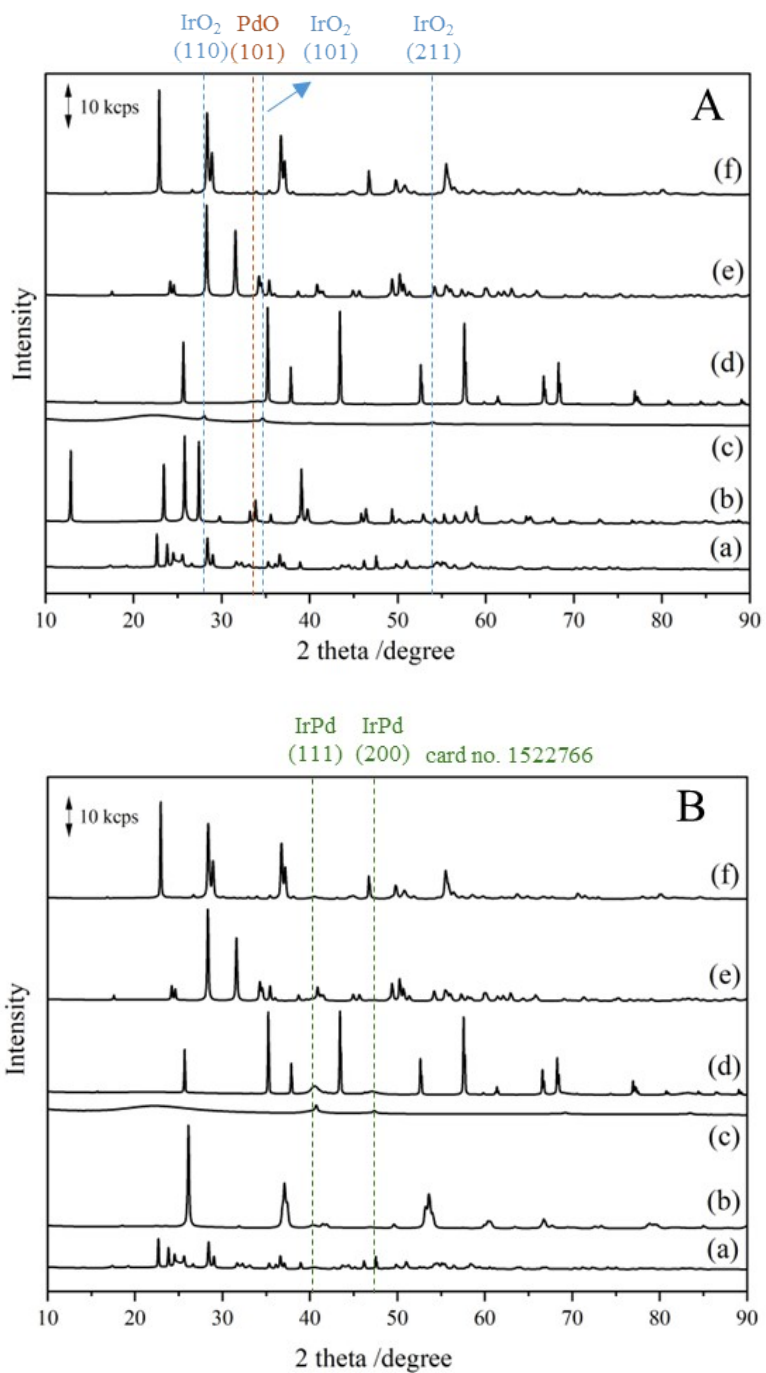

**Figure S9.** XRD patterns of (A) calcined and (B) reduced  $\text{Ir}_{50}\text{Pd}_{50}$ /support: (a)  $\text{Nb}_2\text{O}_5$ , (b)  $\text{MoO}_3$ , (c)  $\text{SiO}_2$ , (d)  $\alpha\text{-Al}_2\text{O}_3$ , (e)  $\text{ZrO}_2$ , and (f)  $\text{Ta}_2\text{O}_5$ .

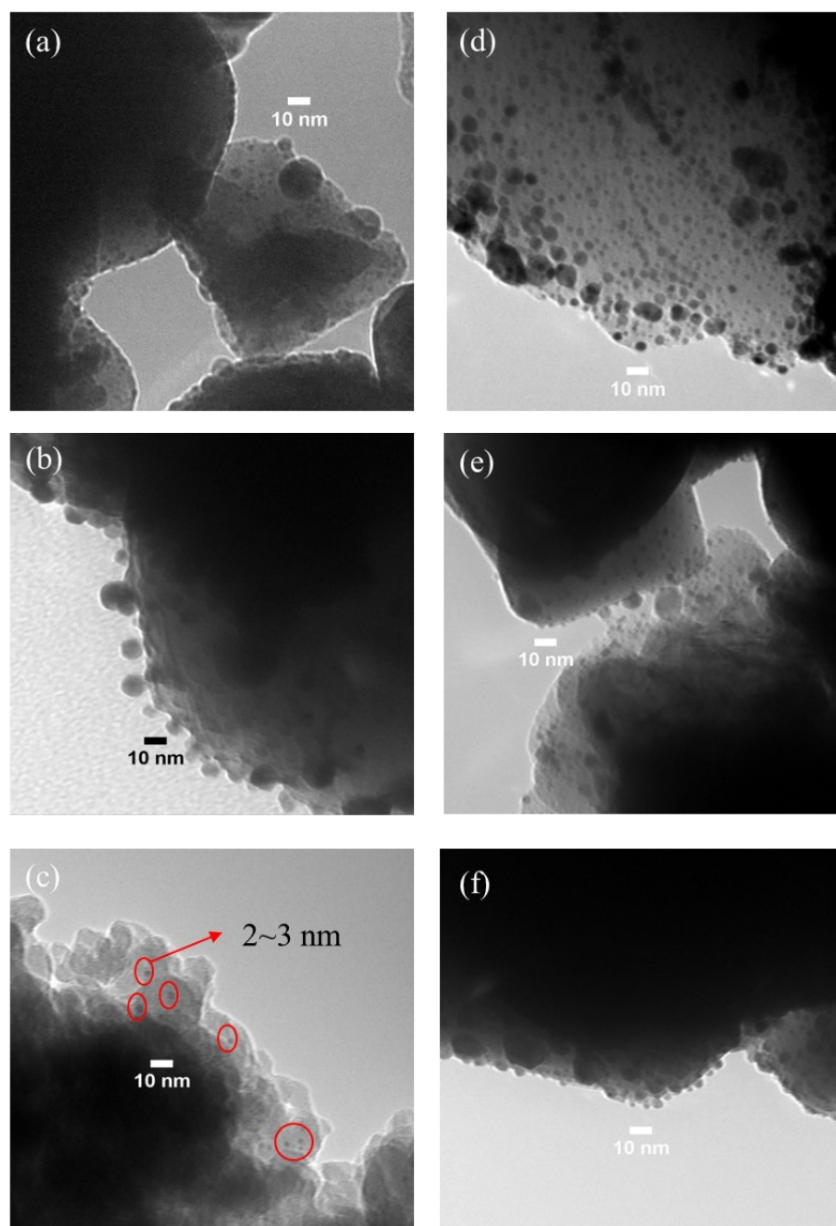

**Figure S10.** TEM images of Ir<sub>50</sub>Pd<sub>50</sub>-supported catalysts: (a) Nb<sub>2</sub>O<sub>5</sub>, (b) MoO<sub>3</sub>, (c) SiO<sub>2</sub>, (d)  $\alpha$ -Al<sub>2</sub>O<sub>3</sub>, (e) ZrO<sub>2</sub>, and (f) Ta<sub>2</sub>O<sub>5</sub>.

**Table S1.** Reagents for catalyst preparation.

| Purpose         | Chemical                                                         | Purity (%)                                | Supplier      |
|-----------------|------------------------------------------------------------------|-------------------------------------------|---------------|
| Metal precursor | $\text{H}_2\text{IrCl}_6 \cdot n\text{H}_2\text{O}$              | 36.0-44.0 wt% as Ir                       | Sigma-Aldrich |
|                 | $\text{Pd}(\text{NO}_3)_2$                                       | 99.9                                      | Fujifilm-Wako |
|                 | $\text{Mn}(\text{NO}_3)_2 \cdot 6\text{H}_2\text{O}$             | 98.0                                      | Fujifilm-Wako |
|                 | $\text{Zn}(\text{NO}_3)_2 \cdot 6\text{H}_2\text{O}$             | 99.0                                      | Fujifilm-Wako |
|                 | $\text{HAuCl}_4 \cdot 4\text{H}_2\text{O}$                       | 99.0                                      | Fujifilm-Wako |
|                 | $\text{SnCl}_2 \cdot 2\text{H}_2\text{O}$                        | 97.0                                      | Kanto         |
|                 | $\text{Ni}(\text{NO}_3)_2 \cdot 6\text{H}_2\text{O}$             | 98.0                                      | Fujifilm-Wako |
|                 | $\text{Co}(\text{NO}_3)_2 \cdot 6\text{H}_2\text{O}$             | 98.0                                      | Fujifilm-Wako |
|                 | $\text{Fe}(\text{NO}_3)_3 \cdot 9\text{H}_2\text{O}$             | 99.9                                      | Fujifilm-Wako |
|                 | $\text{Cu}(\text{NO}_3)_2 \cdot 3\text{H}_2\text{O}$             | 99.0-104.0                                | Fujifilm-Wako |
| Support         | $\text{Nb}_2\text{O}_5$<br>(JRC-NBO-2)*                          | 98.5                                      | CBMM**        |
|                 | $\text{Nb}_2\text{O}_5 \cdot n\text{H}_2\text{O}$<br>(JRC-NBO-1) | $80 \pm 5$ wt% as $\text{Nb}_2\text{O}_5$ | CBMM          |
|                 | $\text{MoO}_3$                                                   | 99.5                                      | Kanto         |
|                 | $\text{ZrO}_2$                                                   | 99.0                                      | Kanto         |
|                 | $\text{Ta}_2\text{O}_5$                                          | 99.95                                     | Kanto         |
|                 | $\text{SiO}_2$ (G-6, 3 $\mu\text{m}$ )                           | 99.8                                      | Fuji Silysia  |
|                 | $\alpha\text{-Al}_2\text{O}_3$                                   | 99.0                                      | Kanto         |

\*JRC: Japan Reference Catalyst

\*\*CBMM: Companhia Brasileira de Metalurgia e Mineraço

**Table S2.** Reagents for hydrogenation reaction and characterization.

| Chemical                              | Purity (%) | Supplier*     |
|---------------------------------------|------------|---------------|
| Dodecanoic acid<br>(Lauric acid)      | 98.0       | Sigma-Aldrich |
| Dodecanol<br>(Lauryl alcohol)         | 98.0       | Sigma-Aldrich |
| Dodecane                              | 99.0       | Fujifilm-Wako |
| Hexadecanoic acid<br>(Palmitic acid)  | 97.0       | TCI           |
| 1-Hexadecanol                         | 98.0       | TCI           |
| Hexadecane                            | 98.0       | TCI           |
| Tetradecanoic acid<br>(Myristic acid) | 99.0       | TCI           |
| 1-Tetradecanol                        | 98.0       | TCI           |
| Tetradecane                           | 99.0       | TCI           |
| Decanoic acid                         | 98.0       | TCI           |
| 1-Decanol                             | 98.0       | TCI           |
| Decane                                | 99.0       | TCI           |
| Naphthalene                           | 98.0       | TCI           |
| 1,4-Dioxane<br>(super dehydrated)     | 99.5       | Fujifilm-Wako |

\*TCI: Tokyo Chemical Industry

**Table S3.** Hydrogenation reaction of dodecanoic acid over Ir<sub>50</sub>X<sub>50</sub>/Nb<sub>2</sub>O<sub>5</sub> catalysts (Ir + X = 0.30 mmol)<sup>a</sup>.

| Secondary element<br>(X) | Conversion (%) | Yield (%) |          |
|--------------------------|----------------|-----------|----------|
|                          |                | Dodecanol | Dodecane |
| Pd                       | 96.8           | 67.7      | 23.8     |
| none                     | 35.1           | 25.7      | 2.2      |
| Mn                       | 14.0           | 4.7       | 0        |
| Au                       | 12.6           | 7.5       | 0        |
| Co                       | 9.2            | 3.7       | 0        |
| Fe                       | 9.0            | 0         | 0        |
| Sn                       | 7.3            | 4.6       | 0        |
| Zn                       | 6.9            | 0         | 0        |
| Ni                       | 4.3            | 3.9       | 0        |
| Cu                       | 1.8            | 0         | 0        |

<sup>a</sup>Reaction conditions: dodecanoic acid (0.1 g), catalyst (0.1 g), 1,4-dioxane (10 mL), H<sub>2</sub> (4.0 MPa), 150 °C, 900 rpm, 17 h.

**Table S4.** Deconvoluted XRS data of reduced Ir<sub>x</sub>Pd<sub>y</sub>/Nb<sub>2</sub>O<sub>5</sub> at the Ir 4f<sub>7/2</sub>, Nb 4s and Pd 3d<sub>5/2</sub> regions.

| Nb <sub>2</sub> O <sub>5</sub> -<br>supported<br>Ir <sub>x</sub> Pd <sub>y</sub> catalyst | Binding energy (eV) (peak share (%))* |                 |            |                      |                  |
|-------------------------------------------------------------------------------------------|---------------------------------------|-----------------|------------|----------------------|------------------|
|                                                                                           | Ir 4f <sub>7/2</sub>                  |                 | Nb 4s      | Pd 3d <sub>5/2</sub> |                  |
|                                                                                           | IrO <sub>x</sub>                      | Ir <sup>0</sup> | Nb         | Pd <sup>0</sup>      | Pd <sup>δ-</sup> |
| Ir <sub>100</sub>                                                                         | 61.3 (13.9)                           | 60.2 (86.1)     | N.D.       | N.A.                 | N.A.             |
| Ir <sub>75</sub> Pd <sub>25</sub>                                                         | 61.6 (10.1)                           | 60.2 (89.9)     | 57.9 (100) | 335.0 (83.7)         | 332.3 (16.3)     |
| Ir <sub>50</sub> Pd <sub>50</sub>                                                         | 61.8 (8.0)                            | 60.2 (92.0)     | 57.8 (100) | 334.9 (70.1)         | 332.6 (29.9)     |
| Ir <sub>25</sub> Pd <sub>75</sub>                                                         | 61.6 (9.8)                            | 60.1 (90.2)     | 58.0 (100) | 334.7 (85.4)         | 332.5 (14.6)     |
| Pd <sub>100</sub>                                                                         | N.A.                                  | N.A.            | N.A.       | 335.1 (100)          | N.D.             |

N.A.: Not Applicable. N.D.: Not Detected.

\*Calculated from the area ratio in the same origin.

**Table S5.** Deconvoluted XRS data of reduced Ir<sub>x</sub>Pd<sub>y</sub>/Nb<sub>2</sub>O<sub>5</sub> at the Nb 3d<sub>5/2</sub> and O 1s regions.

| Nb <sub>2</sub> O <sub>5</sub> -<br>supported<br>Ir <sub>x</sub> Pd <sub>y</sub> catalyst | Binding energy (eV) (peak share (%))* |                  |                  |                       |                             |                             |                             |
|-------------------------------------------------------------------------------------------|---------------------------------------|------------------|------------------|-----------------------|-----------------------------|-----------------------------|-----------------------------|
|                                                                                           | Nb 3d <sub>5/2</sub>                  |                  |                  | O 1s                  |                             |                             |                             |
|                                                                                           | Nb <sup>5+</sup>                      | Nb <sup>4+</sup> | Nb <sup>2+</sup> | Surface<br>adsorption | Nb <sup>5+</sup><br>lattice | Nb <sup>4+</sup><br>lattice | Nb <sup>2+</sup><br>lattice |
| Ir <sub>100</sub>                                                                         | 207.0<br>(82.8)                       | 205.9<br>(17.2)  | N.D.             | 531.5<br>(24.0)       | 530.0<br>(54.8)             | 528.5<br>(21.2)             | N.D.                        |
| Ir <sub>75</sub> Pd <sub>25</sub>                                                         | 207.1<br>(70.4)                       | 205.8<br>(16.5)  | 204.1<br>(13.1)  | 531.7<br>(14.4)       | 530.0<br>(57.0)             | 528.5<br>(13.1)             | 527.1<br>(15.5)             |
| Ir <sub>50</sub> Pd <sub>50</sub>                                                         | 207.0<br>(58.7)                       | 205.6<br>(20.8)  | 204.3<br>(20.4)  | 531.8<br>(7.5)        | 529.9<br>(54.0)             | 528.3<br>(16.9)             | 527.1<br>(21.7)             |
| Ir <sub>25</sub> Pd <sub>75</sub>                                                         | 207.1<br>(70.1)                       | 205.9<br>(13.8)  | 204.4<br>(16.0)  | 531.9<br>(12.0)       | 530.0<br>(65.1)             | 528.5<br>(9.3)              | 527.3<br>(13.6)             |
| Pd <sub>100</sub>                                                                         | 207.4<br>(81.8)                       | 206.4<br>(18.2)  | N.D.             | 531.8<br>(29.2)       | 530.3<br>(55.9)             | 529.0<br>(14.9)             | N.D.                        |

N.D.: Not Detected.

\*Calculated from the area ratio in the same origin.

**Table S6.** Time-dependence of reaction progress over Ir<sub>75</sub>Pd<sub>25</sub>/Nb<sub>2</sub>O<sub>5</sub> in hydrogenation of dodecanoic acid and dodecanol.

| Substrate                    | Reaction time (h) | Conversion (%) | Yield (Selectivity) (%) |             |
|------------------------------|-------------------|----------------|-------------------------|-------------|
|                              |                   |                | Dodecanol               | Dodecane    |
| dodecanoic acid <sup>a</sup> | 2                 | 17.3           | 10.0 (57.6)             | 0           |
|                              | 8                 | 50.5           | 26.8 (53.1)             | 0           |
|                              | 17                | 93.0           | 74.3 (79.9)             | 12.5 (13.4) |
|                              | 24                | 100            | 82.7 (82.7)             | 14.7 (14.7) |
| dodecanol <sup>b</sup>       | 8                 | <1             | —                       | 0           |
|                              | 17                | 7.2            | —                       | 5.6 (77.8)  |
|                              | 24                | 11.2           | —                       | 7.3 (65.2)  |

*Reaction conditions:* substrate (<sup>a</sup>0.1 g: ca. 0.5 mmol, <sup>b</sup>0.5 mmol), Ir<sub>75</sub>Pd<sub>25</sub>/Nb<sub>2</sub>O<sub>5</sub> (0.1 g), 1,4-dioxane (10 mL), H<sub>2</sub> (4.0 MPa), 150 °C, 900 rpm, 17 h.

**Table S7.** Recycling test of Ir<sub>75</sub>Pd<sub>25</sub>/Nb<sub>2</sub>O<sub>5</sub> for hydrogenating dodecanoic acid<sup>a</sup>.

| Reuse           | Conversion (%) | Yield (Selectivity) (%) |             |
|-----------------|----------------|-------------------------|-------------|
|                 |                | Dodecanol               | Dodecane    |
| Fresh           | 93.0           | 74.3 (79.9)             | 12.5 (13.4) |
| 1 <sup>st</sup> | 96.3           | 74.4 (77.2)             | 14.6 (15.2) |
| 2 <sup>nd</sup> | 81.0           | 66.0 (81.5)             | 7.5 (9.3)   |
| 3 <sup>rd</sup> | 82.8           | 67.7 (81.8)             | 12.4 (15.0) |

<sup>a</sup>*Reaction conditions:* dodecanoic acid (0.1 g), catalyst (0.1 g), 1,4-dioxane (10 mL), H<sub>2</sub> (4.0 MPa), 150 °C, 900 rpm, 17 h.

**Table S8.** Hydrogenation reaction of Ir<sub>50</sub>Pd<sub>50</sub>-supported catalysts<sup>a</sup>.

| Ir <sub>50</sub> Pd <sub>50</sub><br>/Support | Conversion<br>(%) | Yield (%) |          |
|-----------------------------------------------|-------------------|-----------|----------|
|                                               |                   | Dodecanol | Dodecane |
| Nb <sub>2</sub> O <sub>5</sub>                | 96.8              | 67.7      | 23.8     |
| MoO <sub>3</sub>                              | 53.8              | 46.9      | 4.8      |
| SiO <sub>2</sub>                              | 6.2               | 2.5       | 0        |
| $\alpha$ -Al <sub>2</sub> O <sub>3</sub>      | 4.4               | 0         | 0        |
| ZrO <sub>2</sub>                              | 2.4               | 0         | 0        |
| Ta <sub>2</sub> O <sub>5</sub>                | 2.0               | 0         | 0        |

<sup>a</sup>Reaction conditions: dodecanoic acid (0.1 g), catalyst (0.1 g), 1,4-dioxane (10 mL), H<sub>2</sub> (4.0 MPa), 150 °C, 900 rpm, 17 h.
